# Supplementary material for: Endoscopic carbon dioxide insufflation tolerance test on the anal sphincter for anorectal hypofunction: a pilot and feasibility study
Source: PubMed Central journal article supplement — Ann Gastroenterol. 2023 May 29;36(4):437–41. doi: 10.20524/aog.2023.0805 (PMC10304521; doi:10.20524/aog.2023.0805), 2023-05-29
Supplement: AnnGastroenterol-36-437_Suppl1.pdf [file AnnGastroenterol-36-437_Suppl1.pdf]

## Supplementary material

**Supplementary Video** Video visually summarizes the actual events, endoscopic view, and measuring and recording equipment used during measurement using the endoscopic pressure study integrated system (EPSIS). Intraluminal pressure measured over time using EPSIS is displayed as a waveform. By simultaneously displaying the EPSIS waveform and the endoscope's real-time image on the same screen, the 2 can be compared and evaluated

You can see: <https://youtu.be/KF--EIk7qmw>
